# Oxytocin and Vasopressin Receptor variants as a window onto the evolution of human prosociality

Constantina Theofanopoulou<sup>1,2,3,+</sup>, Alejandro Andirkó<sup>1,2,+</sup>, and Cedric Boeckx<sup>1,2,4,\*</sup>

<sup>1</sup>Section of General Linguistics, Universitat de Barcelona

<sup>2</sup>Universitat de Barcelona Institute for Complex Systems

<sup>3</sup>Laboratory of Neurogenetics of Language, Rockefeller University

<sup>4</sup>ICREA

\*cedric.boeckx@ub.edu

+these authors contributed equally to this work

## ABSTRACT

Modern humans' lifestyle strongly depends on complex social skills like empathy, tolerance and cooperation. Variation in the oxytocin receptor (*OXTR*) and the arginine-vasopressin receptors (*AVPR1A*, *AVPR1B* genes) has been widely associated with diverse facets of social cognition, but the extent to which these variants may have contributed to the evolution of human prosociality remains to be elucidated. In this study, we compared the *OXTR*, *AVPR1A* and *AVPR1B* DNA sequences of modern humans to those of our closest extinct and extant relatives, and then clustered the variants we identified based on their distribution in the species studied. This clustering, along with the functional importance retrieved for each variant and their frequency in different modern-human populations, is then used to determine if any of the *OXTR*, *AVPR1A* and *AVPR1B*-variants might have had an impact at different evolutionary stages. We report a total of 29 SNPs, associated with phenotypic effects ranging from clearly pro-social to mixed or antisocial. Regarding modern human-specific alleles that could correlate with a shift towards prosociality in modern-humans, we highlight one allele in *AVPR1A* (rs11174811), found at high frequency and linked to prosocial phenotypes in modern humans, while the ancestral allele is associated with antisocial phenotypes. We also report three sites of putatively convergent changes between modern humans and bonobos (rs237897(A), rs2228485(G) and rs1042615(A)), and note the absence of such a convergent pattern between modern humans and chimpanzees. Finally, we observe the high concentration of 'modern human specific' alleles in vasopressin receptors not paralleled in the oxytocin receptor.

## 1 Introduction

Oxytocin (OXT) and vasopressin (AVP) are important neurotransmitters that function through their respective receptors to regulate a diverse set of biological processes, such as pregnancy and uterine contractions, milk-ejection, copulation and orgasm, attachment between mothers and their young, bond formation, suppression of stress, thermoregulation, olfactory processing, eye-contact and recognition of familiar individuals<sup>1</sup>. OXT and AVP are closely related structurally and evolutionarily: they have been argued to be the product of a local duplication event that took place before the origin of vertebrates<sup>2</sup>, and they only differ in two (of the nine) amino acids, although they display differences at a functional level<sup>1</sup>. Each binds to their respective receptor(s) (*OXTR* in the case of oxytocin, and *AVPR1A*, *AVPR1B*, and *AVPR2* in the case of vasopressin), but their molecular similarities allow for crosstalk in the brain and peripheral organs<sup>3</sup>.

Variation in the genes that code for OXT and AVP receptors (*OXTR* and mainly *AVPR1A* and *AVPR1B*) have long been associated with different social behaviors<sup>4</sup>. Single Nucleotide Polymorphisms (SNPs) in these genes in modern humans have been claimed to be implicated in altruism, face recognition, stress levels and empathy, but also in sociocognitive disorders, such as Autism Spectrum Disorders (ASD), bipolar disorder, schizophrenia or depression<sup>1,5</sup>. Due to the paucity of studies on social effects of *AVPR2*, we did not include this receptor in the present study.

The role oxytocin and vasopressin play in social cognition makes them prominent candidates to test for possible social behavioral differences between hominid species (extinct and extant). In this study we examine the extent to which variation in the OXT and AVP receptors correlate with social characteristics that have already been put forth in the literature to characterize the prosocial profile of each of the species studied here (modern humans, archaic humans such as Neanderthals and Denisovans, bonobos and chimpanzees). 'Prosociality' is a broad term that encompasses intraspecies empathy, social tolerance, cooperation and altruism. While our closest living relatives, the chimpanzees (*Pan Troglodytes*) and the bonobos (*Pan Paniscus*), live in highly organized social groups as well, present-day humans' social networks are larger and denser, powered by a complex social cognitive machinery<sup>6</sup>. Modern humans are characterized by great intrasocial compassion, are motivated by concern

34 about the welfare of out-group individuals, and display a clear tendency to act in concert, to the extent that *Homo Sapiens* has  
35 been labeled as ‘ultra-social’<sup>7</sup>. This trait is of special relevance, as it has been argued to underlie other singular traits of humans,  
36 such as their enhanced verbal communicative skills<sup>6-10</sup>.

37 The sequencing of two Neanderthal genomes from Altai (Siberia)<sup>11</sup> and Vindija (Croatia)<sup>12</sup> and a Denisovan from Altai<sup>13</sup>  
38 has made available genomic data to provide new insights into the discussion of the evolution of social cognition, complementing  
39 the archaeological evidence. Today, various hypotheses<sup>6,10,14,15</sup> still offer different explanations and timelines for the emergence  
40 of prosociality, ranging from the *Pan-Homo* split to later stages of human evolution, such as the split between Neanderthals and  
41 Denisovans on the one hand, and Modern Humans on the other. The critical effect of OXT and AVP on pair-bonding has led  
42 some of the authors of the aforementioned theories, most prominently,<sup>14</sup> to ascribe to them a key role in the emergence of  
43 human social behavior, while others have challenged the centrality of OXT and AVP in this shift in favor of other hormones,  
44 such as  $\beta$ -endorphins and dopamine<sup>10,16</sup>. By examining the evolutionary variation in human OXT and AVP receptors, we  
45 aim to shed light onto the timing of the transition towards the current status of human prosociality, as well as determine more  
46 clearly the specific role that OXT and AVP could have played in this regard.

47 As of now, none of the studies searching for fixed changes between modern and archaic humans (Neanderthals and  
48 Denisovans) have identified changes on the genes coding for the OXT and AVP ligands and receptors<sup>11,17</sup>. The only study<sup>17</sup>  
49 systematically exploring non-synonymous changes at high frequency in modern humans for which archaic humans carry the  
50 ancestral state found that *AVPR1B* is in the top 5% of the genes enriched for high frequency-changes in modern humans  
51 (controlling for gene length).

52 For this reason, in this study we investigated the variants that differ in modern and archaic humans on the *OXTR*, *AVPR1A*  
53 and *AVPR1B* genes, focusing on those that are polymorphic in modern humans and that have been associated with specific  
54 behavioral correlates in the literature, using also allele-frequency data from modern humans of different ethnic backgrounds.  
55 In order to infer the ancestral state (allele) of these sites we used primate species’ sequences (rhesus macaque, chimpanzee,  
56 bonobo). We also took into account variation data (Single Nucleotide Variants: SNVs) from multiple chimpanzee and bonobo  
57 individuals. We identify various changes in the analyzed genes which we clustered in different evolutionary stages, based on  
58 their distribution (presence or absence) in the different species/populations studied (e.g. Homo-specific, modern human-specific,  
59 Altai Neanderthal-specific). These changes have been reported in the literature to affect gene expression, brain regions such  
60 as the mesolimbic reward system, and behavioral phenotypes. A fair amount of those polymorphic sites also confer risk of  
61 sociocognitive disorders, like Autism Spectrum Disorder (ASD). Finally, we discuss how the information we have gathered  
62 bears on several hypotheses concerning the evolution of human prosociality, including the neurochemical hypothesis<sup>10</sup>, the  
63 social-brain hypothesis<sup>6</sup> and the self-domestication hypothesis<sup>14,15</sup>.

## 64 2 Results

65 The DNA sequence-alignment we performed gave rise to a list of SNPs that we ordered in clusters (shown in Tables 1-2 ),  
66 based on their distribution in the sequences studied, with the major distinction being SNPs present only in modern humans  
67 (MHS: modern human-specific) vs. SNPs shared between modern humans and one or more archaics, and those distinguishing  
68 *Homo* from *Pan*. In this section we present the SNPs we identified, along with their potential functional relevance, based  
69 on data mining as well as our independent analysis (SNAP2 test). We discuss the results following their distribution pattern:  
70 from total overlap (alleles found in all the species considered) to no overlap at all (e.g., alleles found exclusively in modern  
71 populations, or MHS), and summarize the key information in Table 1 (for the oxytocin receptor) and Table 2 and 3 (for  
72 vasopressin receptors). Figures 1-2 provide graphic summaries of the main results. Frequencies of the relevant alleles in modern  
73 human populations retrieved from the sources consulted (see Methods) are provided in Supplementary Tables 1-2. A series of  
74 archaic human-specific variants were also identified and are reported in Supplementary table 3. Just one of them (rs199856198,  
75 G/A) was found to be an extremely rare allele in modern humans (<0.002). Rs199856198 is a missense variant in exon four of  
76 *OXTR* that changes Threonine for Methionine at the 360th position. While its effects have not been investigated, the SNAP2  
77 test we performed gave a predicted 63% for a possible effect on the phenotype.

78 Only four alleles discussed here are not shared by the three non-human primates we used: rs237897(A) and rs2228485(G)  
79 are shared between modern humans and only bonobos; and rs11131149 (A) is found also in rhesus macaques (*Macaca mulatta*),  
80 but not in chimpanzees or bonobos.

### 81 2.1 Oxytocin receptor

82 The intronic variants rs11131149(A), rs59190448(G) and rs13316193(C), the 3’-UTR variant rs9872310(G) and the missense  
83 SNP rs4686302(T) are found in both present-day populations and the three ancient human sequences used in this study.  
84 Rs11131149(A), already attested in macaques, has been reported to have the reverse effect of the G allele, which is found  
85 in chimpanzees and bonobos and correlates with higher social performance (empathy, joint attention, cooperation and self-  
86 recognition) in 18 month-children<sup>18</sup>. Interaction between the G allele and maternal cognitive sensitivity accounted for a 26% of

87 variability in a Theory of Mind scale in 4.5 year old-children<sup>18</sup>. Rs11131149(G) is also part of a haplotype related to depressive  
88 temperament<sup>19</sup>.

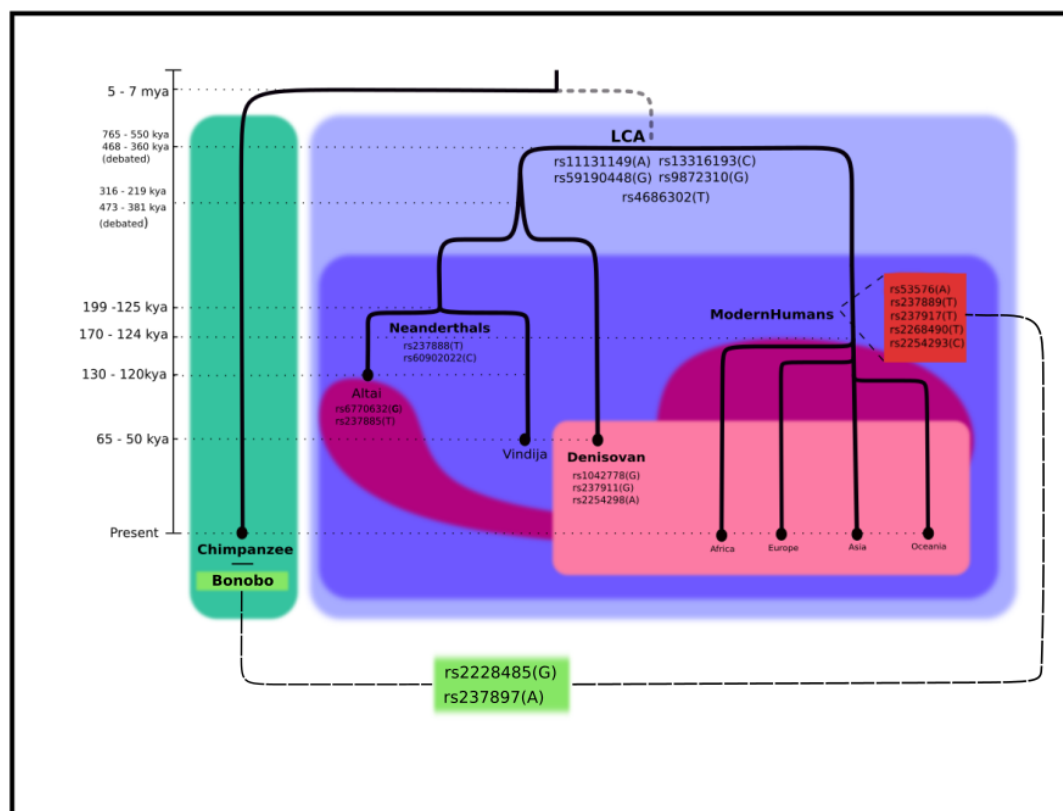

**Figure 1.** Evolutionary distribution of *OXTR* alleles. The alleles displayed are the non-ancestral ones. LCA = Last Common Ancestor.

89 Rs59190448(G) has been argued to show signs of positive selection in present-day humans<sup>20</sup>. The only known endopheno-  
90 type associated with it is increased risk of anxiety, stress and depression in early life<sup>21</sup>. Rs13316193(C) has been related to  
91 empathy<sup>22</sup> and high cooperation and comforting skills<sup>23</sup>, but also to late onset of Obsessive Compulsive Disorder<sup>24</sup>, poorer  
92 social skills<sup>25</sup> and significant association with Attention Deficit/Hyperactivity Disorder (ADHD) on the Social Communication  
93 Questionnaire<sup>26</sup>; rs13316193(T) is part of a haplotype linked to ASD<sup>27</sup>, depressive mood<sup>19</sup>, and poorer empathic communica-  
94 tion in relationships<sup>28</sup>. The T allele also affects *OXTR* total gene expression in the brain<sup>29</sup>. Rs9872310(G) has been implicated  
95 in altruism and ASD in different studies<sup>27,30</sup>, but its specific functionality has not been investigated further. The rs4686302(T)  
96 allele benefits perspective taking<sup>22</sup> and social connectedness (in men)<sup>31</sup> compared to the C allele, while ADHD T-carriers  
97 performed significantly worse on the face emotion recognition task than C-carriers<sup>31</sup>.

98 *OXTR* alleles rs237888(T) and rs60902022(C), both intronic, are found in both (Altaï and Vindija) Neanderthal sequences  
99 but are absent in the Denisovan sequence. The ancestral allele rs237888(C) has been associated with daily life-skills score in  
100 the Vineland Adaptive Behavior Scales (VABS) test in ASD patients, as well as with IQ measurements<sup>27</sup>, and the T allele has  
101 been linked to greater impairment in ASD<sup>32</sup>. Rs237888 is part of a haplotype related to altruism in the Dictator Game<sup>30</sup> (an  
102 experimental economics paradigm where participants have to assign amounts of money to different individuals) and it has been  
103 also been associated with DNA methylation of specific CpG sites (cg25140571 and cg00247334) that are linked to abuse and  
104 psychiatric symptoms<sup>33</sup>. Rs60902022(C) has been claimed to affect gene expression and transcription factor binding by linkage  
105 disequilibrium (LD) with other *OXTR* variants<sup>34</sup>.

106 In addition to these SNPs, we identified in the Altaï Neanderthal *OXTR* sequence two present-day human alleles not found

107 in the Vindija and Denisova sequences: rs6770632(C) and rs237885(T). The 3'UTR rs6770632(G) has been associated with  
108 VABS scores<sup>27</sup> and persistent, extreme aggression, with the C and T alleles affecting male and female children, respectively<sup>35</sup>.  
109 rs237885(T) has been associated with callous/unemotional traits<sup>35</sup>, ASD<sup>36</sup>, schizophrenia diagnosis<sup>37</sup> and higher risk of  
110 aggression<sup>38</sup>, while the G allele is linked to altruistic allocations in the Dictator Game<sup>30</sup>.

111 Modern human alleles found in the Denisovan individual but not in Altai or Vindija Neanderthals are rs1042778(G),  
112 rs2254298(A) and rs237911(G). The T allele of rs1042778 has been associated with lower levels of OXT in plasma, diminished  
113 parental care (parent-child gaze and touch)<sup>39</sup> and panic/aggressive behaviors<sup>40</sup>, while the G allele has been linked to ASD<sup>27,40,41</sup>  
114 and to aggression in males<sup>35</sup>. However, this latter association is at odds with other findings concerning the G allele reporting a  
115 significant correlation with prosocial fund allocations in the Dictator Game setting<sup>30</sup> (although<sup>42</sup> failed to replicate the result)  
116 and higher scores in altruistic and comforting behaviors<sup>23</sup>. According to<sup>43</sup>, T-allele carriers are likely to recover from the  
117 effects of low maternal emotional warmth and acceptance, whereas G-carriers do not show such a pattern. But based on another  
118 study<sup>44</sup>, it was G allele-carriers who experienced gains in daily positive emotions from loving-kindness training, whereas  
119 individuals with the T allele did not. Additionally, it has been suggested that rs1042778(G) influences *OXTR* transcription and  
120 translation processes, as well as *OXTR* gene expression in the amygdala<sup>29,30</sup>.

121 Rs2254298(A) and rs237911(A) are overtransmitted in ASD patients<sup>36,45</sup>, a result confirmed in a meta-analysis that included  
122 eleven cohorts<sup>46</sup>. Such effects seem to depend on ethnicity, as<sup>45</sup> and<sup>36</sup> used Chinese and Japanese samples, while a study using  
123 a Caucasian sample found rs2254298(G) to be the variant associated with ASD<sup>27,47</sup>. rs2254298(G) has been associated with  
124 lower communication scores in romantic relationships<sup>28</sup>, variation in empathy scores<sup>22</sup>, methylation at cg11589699 (a site  
125 linked to depression and anxiety level increase)<sup>48</sup>, less sensitive parenting and lower plasma OXT levels<sup>39</sup>, but also with higher  
126 values of positive affect and lower scores in depressive temperament in a Japanese sample<sup>19</sup>.

127 Rs2254298(A) carriers performed better in self-reported empathy<sup>37</sup> and empathy for pain in particular<sup>49</sup>, parenting<sup>50</sup> and in  
128 attachment security tests (in a non-Caucasian children sample)<sup>51</sup>, while A-ADHD-carriers displayed fewer social deficits<sup>26</sup>.  
129 On the contrary, A-ASD-carriers presented more social deficits<sup>26</sup> and lower serum OXT-levels<sup>52</sup>. This allele has also been  
130 related to prosopagnosia<sup>53</sup>, high levels of physical aggression and hostility<sup>54</sup> and low emotion recognition and resilience  
131 skills<sup>55</sup>. G-carriers showed higher levels of retrospective self-report of inhibition and adult separation anxiety<sup>56</sup> and, compared  
132 to A-carriers, are more vulnerable to antisocial behavior if they experience maltreatment<sup>57</sup>. This SNP also has interesting  
133 anatomical associations: the A allele was associated with larger amygdalar volume in healthy Asian adults<sup>58,59</sup>, a phenotype  
134 typically identified in the early stages of autism<sup>58</sup>, and which correlated with heightened amygdala response during two  
135 functional magnetic resonance imaging (fMRI) tasks that involved viewing socially-relevant face stimuli<sup>59</sup>. However, this  
136 association was not replicated though in a healthy Caucasian sample<sup>60</sup>. Gender might be playing a role in these associations,  
137 since A-female carriers showed smaller left amygdala volume, while it was G-male-carriers that showed smaller left amygdala,  
138 which was also negatively associated with attitudinal trust<sup>61</sup>.

139 Finally, the intronic alleles rs2268490(T), rs2268493(C), rs237889(T), rs237917(T), and rs53576(A) were only present in  
140 modern human populations. In addition, the intronic rs237897(A) and the synonymous variant rs2228485(G) are only attested  
141 in modern human populations and in bonobos, and are thus putative instances of convergent evolution.

142 The archaic rs2268490(C) allele positively affects the amount of funds altruistically given in the Dictator Game setting<sup>30</sup>  
143 and might provoke vocal alterations under stress. Carriers of the MHS C allele displayed more stress-related vocal symptoms  
144 (dysphonia, muscle tension, frequency changes) and higher cortisol levels<sup>62</sup>. The MHS allele rs2258493(T) has been linked  
145 to ASD subphenotypes<sup>63</sup> and diagnosis<sup>41,64,65</sup>, negative scores in social performance, perception and mentalizing tasks in  
146 schizophrenia patients<sup>66</sup>, ADHD patients<sup>67</sup> and depressive temperament (as part of a haplotype block)<sup>19</sup>. Carriers of this allele  
147 also showed reduced mesolimbic reward system activation, a result that might point towards the neurobiological basis of the  
148 aforementioned phenotypic effects of this SNP<sup>68</sup>.

149 Rs237889(T) has been associated with ASD, both as part of a deleterious haplotype<sup>27</sup> and independently<sup>69</sup>, as well as  
150 with differences in moral judgment; carriers of the archaic C allele were more prone to give utilitarian answers in dilemmas<sup>70</sup>.  
151 Rs237897(A) is part of a haplotype related to ASD<sup>27</sup>, altruism in males<sup>30</sup>, lower self-reported betrayal levels<sup>71</sup>, continuous  
152 social connectedness<sup>72</sup>, and Theory of Mind<sup>18</sup>. Alleles of rs53576 have been reported in several studies: the G allele has been  
153 reported to be implicated in Bullimia Nerviosa<sup>73</sup>, but also in diminished stress after social support<sup>74</sup>, adult separation anxiety<sup>75</sup>,  
154 oxytocin sensitivity in social cooperation settings (increased in males, decreased in females)<sup>76</sup>, overall weak social cognition  
155 skills in ADHD patients<sup>25</sup> and facial recognition deficits<sup>53</sup>. MHS rs53576(A) might be involved in ASD<sup>27,45</sup>, higher empathic  
156 performance<sup>77,78</sup> and social connectedness in women<sup>31</sup>, but also lower psychological resources such as self-esteem, optimism  
157 and emotional mastery<sup>79</sup>. Though the literature on rs53576 doesn't provide unequivocal results, there seems to be consensus on  
158 this SNP being dependent on environmental factors: the G allele appears to affect social sensitivity; adverse life conditions  
159 can lead to negative (non-prosocial) behavior in G carriers, but the opposite effect has also been reported<sup>80</sup>. Rs237917(T) is  
160 related to emotion recognition<sup>81</sup>. SNP rs2228485(A) is part of a haplotype related to loneliness<sup>82</sup> and overtransmitted in ASD<sup>45</sup>.  
161 Carriers of the G allele were more prone to give incorrect answers when required to identify negative emotions in male face

162 images<sup>83</sup>.

**Table 1. Allele distribution on the *OXTR*-SNPs in the species studied. Al: allele, Pop.: population, Ancestral: also found in Macaques, Bonobos, Chimpanzees. Ancestral: also found in bonobos. Homo: also found in Archaic (Neanderthals, Denisovans) and Modern Humans. Abbreviations: MH: Modern Humans, MHS: Modern Human-Specific, Neand: Neanderthals, Den: Denisovan, B: Bonobos, TFB: Transcription Factor Binding, LD: Linkage Disequilibrium.**

| SNP        | Type     | Al. | Pop.                        | Effect                                                                                                                                                                        | Trial sample                                                                              | Other remarks                                                   |  |
|------------|----------|-----|-----------------------------|-------------------------------------------------------------------------------------------------------------------------------------------------------------------------------|-------------------------------------------------------------------------------------------|-----------------------------------------------------------------|--|
| rs2228485  | Exonic   | A   | Ancestral                   | Loneliness <sup>82</sup>                                                                                                                                                      | 285                                                                                       | Synonymous.<br>A/G in Bonobos,<br>A in Chimpanzees              |  |
|            |          | G   | MHS<br>(also present in B.) | ASD <sup>45</sup><br>Emotion recognition <sup>83</sup>                                                                                                                        | 195 (Chinese)                                                                             |                                                                 |  |
| rs237897   | Intronic | G   | Ancestral                   |                                                                                                                                                                               |                                                                                           | G/A in Bonobos,<br>G in Chimpanzees                             |  |
|            |          | A   | MHS<br>(also present in B.) | ASD <sup>27</sup><br>Altruism <sup>30</sup><br>Lower self-reported betrayal levels <sup>71</sup><br>Social connectedness <sup>72</sup><br>Theory of Mind <sup>18</sup>        | 152<br>203<br>165<br>11.000<br>301                                                        |                                                                 |  |
|            |          |     |                             |                                                                                                                                                                               |                                                                                           |                                                                 |  |
|            |          |     |                             |                                                                                                                                                                               |                                                                                           |                                                                 |  |
|            |          |     |                             |                                                                                                                                                                               |                                                                                           |                                                                 |  |
| rs11131149 | Intronic | G   | Ancestral                   | Theory of Mind, higher levels of social cognition <sup>18</sup><br>Depressive mood <sup>19</sup>                                                                              | 350 children<br>493 (Japanese)                                                            | Present in macaque                                              |  |
|            |          | A   | Homo                        | Lower levels of social cognition <sup>18</sup>                                                                                                                                | 350 children                                                                              |                                                                 |  |
| rs59190448 | Intronic | A   | Ancestral                   |                                                                                                                                                                               |                                                                                           | Positive selection <sup>20</sup>                                |  |
|            |          | G   | Homo                        | Anxiety, stress and depression risk <sup>21</sup>                                                                                                                             | 653                                                                                       |                                                                 |  |
| rs13316193 | Intronic | T   | Ancestral                   | ASD <sup>27</sup><br>Depressive mood <sup>19</sup><br>Poor empathic communication <sup>28</sup>                                                                               | 152<br>493 (Japanese)<br>120                                                              | Affects <i>OXTR</i> total expression in the brain <sup>29</sup> |  |
|            |          | C   | Homo                        | Empathy <sup>22</sup><br>Poor social skills <sup>25</sup><br>Greater cooperation and comforting <sup>23</sup><br>ADHD <sup>24</sup><br>Face emotion recognition <sup>26</sup> | 101(Chinese)<br>112<br>422 (Chinese males)<br>276 ADHD patients<br>151 children with ADHD |                                                                 |  |
|            |          |     |                             |                                                                                                                                                                               |                                                                                           |                                                                 |  |
|            |          |     |                             |                                                                                                                                                                               |                                                                                           |                                                                 |  |
|            |          |     |                             |                                                                                                                                                                               |                                                                                           |                                                                 |  |
| rs9872310  | 3' UTR   | A   | Ancestral                   |                                                                                                                                                                               |                                                                                           |                                                                 |  |
|            |          | G   | Homo                        | Altruism <sup>30</sup><br>ASD <sup>27</sup>                                                                                                                                   | 203<br>152                                                                                |                                                                 |  |
| rs4686302  | Exonic   | C   | Ancestral                   |                                                                                                                                                                               |                                                                                           | Missense                                                        |  |
|            |          | T   | Homo                        | Better perspective taking skills <sup>22</sup><br>Face emotion recognition <sup>84</sup><br>Social connectedness in men, opposite in women <sup>31</sup>                      | 101(Chinese)<br>151 children with ADHD<br>Over 11000 individuals                          |                                                                 |  |
| rs237888   | Intronic | C   | Ancestral                   | IQ and VABS scores <sup>27</sup><br>Altruism <sup>30</sup>                                                                                                                    | 152<br>203                                                                                |                                                                 |  |



|            |          |            |                         |                                                                                                                                                                                                                                                                                                                                                                                                                                                                                                                                                                                                                     |                                                                                                                                                                                            |                         |                                                                                                    |
|------------|----------|------------|-------------------------|---------------------------------------------------------------------------------------------------------------------------------------------------------------------------------------------------------------------------------------------------------------------------------------------------------------------------------------------------------------------------------------------------------------------------------------------------------------------------------------------------------------------------------------------------------------------------------------------------------------------|--------------------------------------------------------------------------------------------------------------------------------------------------------------------------------------------|-------------------------|----------------------------------------------------------------------------------------------------|
|            |          | T          | MH+Neand                | Greater impairment of ASD <sup>32</sup>                                                                                                                                                                                                                                                                                                                                                                                                                                                                                                                                                                             | 1002                                                                                                                                                                                       | ASD patients            |                                                                                                    |
|            |          |            |                         | Methylation of CpG sites linked to abuse and psychiatric symptoms <sup>33</sup>                                                                                                                                                                                                                                                                                                                                                                                                                                                                                                                                     | 393                                                                                                                                                                                        | African American adults |                                                                                                    |
| rs60902022 | Intronic | T<br>C     | Ancestral<br>MH+Neand   |                                                                                                                                                                                                                                                                                                                                                                                                                                                                                                                                                                                                                     |                                                                                                                                                                                            |                         | May affect TFB through LD <sup>34</sup>                                                            |
| rs6770632  | 3' UTR   | A<br>G     | Ancestral<br>MH+Altai   | Aggression <sup>35</sup><br>VABS scores <sup>27</sup>                                                                                                                                                                                                                                                                                                                                                                                                                                                                                                                                                               | 160 children<br>152                                                                                                                                                                        |                         |                                                                                                    |
| rs237885   | Intronic | G<br>T     | Ancestral<br>MH+Altai   | Altruism <sup>30</sup><br>ASD <sup>36</sup><br>Schizophrenia <sup>37</sup><br>Callous/unemotional traits <sup>35</sup><br>Higher risk of aggression <sup>38</sup>                                                                                                                                                                                                                                                                                                                                                                                                                                                   | 203<br>282 (Japanese)<br>145<br>160 children<br>488 cases, 488 control (Chinese)                                                                                                           |                         |                                                                                                    |
| rs1042778  | 3' UTR   | T<br><br>G | Ancestral<br><br>MH+Den | Lower levels of OXT in plasma, diminished parental care <sup>39</sup><br>Panic and aggressive behaviors <sup>40</sup><br>Recovery from low maternal emotional warmth <sup>43</sup><br>ASD <sup>27,40,41</sup><br>Aggression <sup>35</sup><br>Prosocial fund allocations in the Dictator Game <sup>30</sup><br>Might lower transcription levels of <i>OXTR</i> <sup>40</sup><br>Altruism, comforting behavior <sup>23</sup><br>Positive emotions after training <sup>44</sup>                                                                                                                                        | 352<br><br>2341<br><br>152, 2333, 209<br>160 children<br>203<br><br>422 Chinese males<br>122                                                                                               |                         | Affects <i>OXTR</i> transcription and translation processes, amygdalar expression <sup>29,30</sup> |
| rs237911   | 5' UTR   | A<br><br>G | Ancestral<br><br>MH+Den | ASD <sup>36,45,46</sup>                                                                                                                                                                                                                                                                                                                                                                                                                                                                                                                                                                                             | 195 (Chinese),<br>282 (Japanese),<br>3941                                                                                                                                                  |                         | A/C in macaque                                                                                     |
| rs2254298  | Intronic | G<br><br>A | Ancestral<br><br>MH+Den | Lower communication <sup>28</sup><br>Variation in empathy <sup>22</sup><br>Methylation at cg11589699 (increased depression and anxiety) <sup>48</sup><br>Less sensitive parenting and lower plasma OXT <sup>39</sup><br>Higher positive affect <sup>37</sup><br>Lower scores in depressive temperament <sup>19</sup><br>Higher levels of Retrospective Self-Report of Inhibition and Adult Separation Anxiety <sup>56</sup><br>Smaller left amygdala <sup>61</sup><br>ASD <sup>36,45,46</sup><br>Lower levels of emotion recognition and resilience scores <sup>55</sup><br>Increased amygdala volume <sup>59</sup> | 120<br>101 (Chinese)<br>393 (African American)<br>352<br>352<br>493 (Japanese)<br>93 patients<br>211 (men), 199 (women)<br>195 (Chinese),<br>282 (Japanese),<br>3941<br>264 (Korean)<br>55 |                         |                                                                                                    |

|           |          |   |           |                                                                                                              |                                                         |                                                           |
|-----------|----------|---|-----------|--------------------------------------------------------------------------------------------------------------|---------------------------------------------------------|-----------------------------------------------------------|
|           |          |   |           | Fewer social deficits in an ADHD sample more social deficits in an ASD sample <sup>26</sup>                  | 341 (ASD patients), 276 (ADHD patients)                 |                                                           |
|           |          |   |           | Lower serum OT in ASD patients <sup>52</sup>                                                                 | 55 (ASD patients), 110 (controls)                       |                                                           |
|           |          |   |           | Positive parenting behavior, physically controlling behavior <sup>50</sup>                                   | 157 mothers                                             |                                                           |
|           |          |   |           | Reponsive to the impact of adversity <sup>49</sup>                                                           | 302                                                     |                                                           |
|           |          |   |           | High levels of physical aggression <sup>54</sup>                                                             | 197 (Chinese) adolescents                               |                                                           |
|           |          |   |           | Vulnerability for antisocial behavior after maltreatment                                                     | 1591                                                    |                                                           |
| rs53576   | Intronic | G | Ancestral | Bullimia Nerviosa <sup>73</sup>                                                                              | 262 (Korean)                                            |                                                           |
|           |          |   |           | Diminished stress <sup>74</sup>                                                                              | 176 (77 Caucasian, 99 non-Caucasian)                    |                                                           |
|           |          |   |           | Separation anxiety <sup>75</sup>                                                                             | 185                                                     |                                                           |
|           |          |   |           | Oxytocin sensitivity in social cooperation settings (increased in males, decreased in females) <sup>76</sup> | 204                                                     |                                                           |
|           |          |   |           | Weak social cognition in ADHD <sup>25</sup>                                                                  | 112                                                     |                                                           |
|           |          | A | MHS       | ASD <sup>27,45</sup>                                                                                         | 195 (Chinese), 152                                      | 18 (Italian), 6 (German)                                  |
|           |          |   |           | Empathy <sup>77,78</sup>                                                                                     | 50, 192 (multiple ethnicities)                          |                                                           |
|           |          |   |           | Lower psychological resources <sup>79</sup>                                                                  | 344                                                     |                                                           |
|           |          |   |           | Social connectedness (women) <sup>31</sup>                                                                   | Over 11000                                              |                                                           |
| rs2268490 | Intronic | C | Ancestral | Altruism <sup>30</sup>                                                                                       | 203                                                     |                                                           |
|           |          |   |           | Vocal alterations under stress <sup>62</sup>                                                                 | 657 (Finnish twins)                                     |                                                           |
|           |          | T | MHS       | Stress-related vocal symptoms and higher cortisol levels <sup>62</sup>                                       | 657 (Finnish twins)                                     |                                                           |
| rs2268493 | Intronic | T | Ancestral | ASD <sup>41,63-65</sup>                                                                                      | 417 (multiple ethnicities), 530 (Caucasian), 527, 2,333 | Reduced mesolimbic reward system activation <sup>68</sup> |
|           |          |   |           | Negative scores in social tasks in schizophrenia <sup>66</sup>                                               | 74                                                      |                                                           |
|           |          |   |           | ADHD <sup>67</sup>                                                                                           | 99                                                      |                                                           |
|           |          |   |           | Depressive temperament <sup>19</sup>                                                                         | 493 (Japanese)                                          |                                                           |
|           |          | C | MHS       |                                                                                                              |                                                         |                                                           |
| rs237917  | Intronic | C | Ancestral |                                                                                                              |                                                         |                                                           |
|           |          | T | MHS       | Emotion recognition <sup>81</sup>                                                                            | 207 (Central European)                                  |                                                           |
| rs237889  | Intronic | C | Ancestral | Utilitarian answers in dilemmas <sup>70</sup>                                                                | 228, 322                                                |                                                           |
|           |          | T | MHS       | ASD <sup>27</sup>                                                                                            | 152                                                     |                                                           |

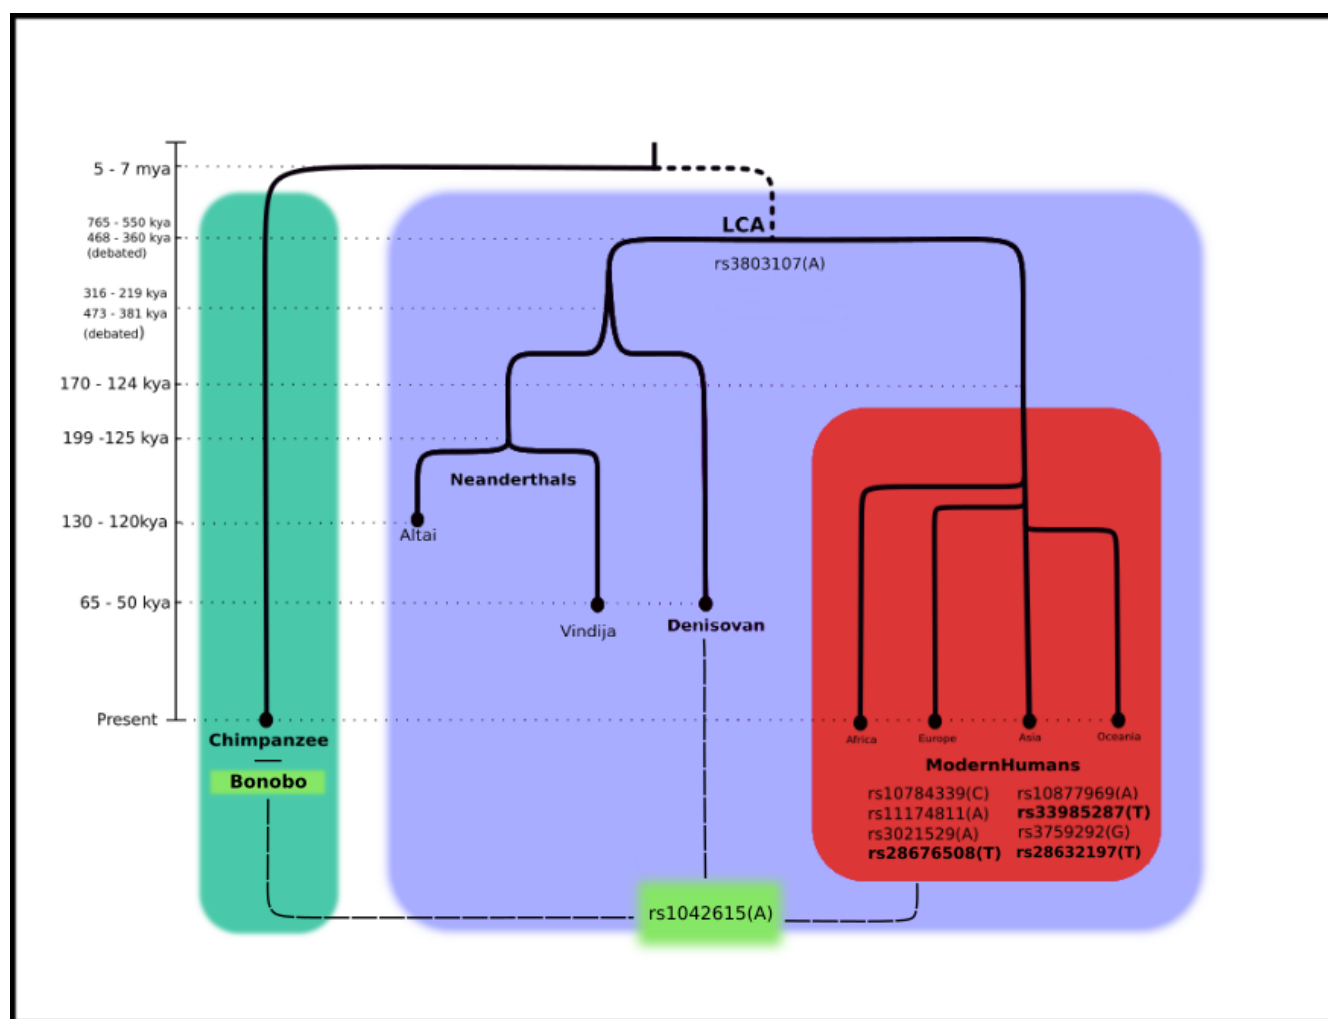

**Figure 2.** Evolutionary distribution of *AVPR1A* (regular) and *AVPR1B* (bold) alleles. The alleles displayed are the non-ancestral ones. LCA = Last Common Ancestor.

## 2.2 Vasopressin receptors

The distribution of vasopressin receptors is somewhat less complex than that of the oxytocin receptor. For example, we could not identify any sites that are both polymorphic in modern humans and different within the two neanderthals included in our study.

Only one modern human allele of *AVPR1A* was identified in both the Neanderthal and Denisovan genomes: rs3803107(A). Rs3803107(A) (3'-UTR) has been studied in relation to ASD in an Irish sample, but this correlation did not reach the level of significance<sup>85</sup>. Rs1042615(A), a synonymous variant of *AVPR1A*, also showed association with ASD in present-day humans<sup>86</sup> and often occurring vocal symptoms during stress<sup>62</sup>, but in the ancient DNA sample it was only found in the Denisovan individual. Rs1042615(A) is the third site in this study that is also found in bonobos, constituting another potential convergent site.

The ancestral G allele of the 3'-UTR variant rs10784339 has been associated with stress reactivity and substance addiction risk<sup>87,88</sup>, while the function of the MHS C allele is unknown. The ancestral C allele of rs11174811 (3'UTR) is related to substance addiction risk<sup>87,88</sup>, but also to higher anxiety levels<sup>89</sup> and aggression<sup>35</sup>. The MHS variant disrupts a microRNA binding site, increasing the expression levels of *AVPR1A* and possibly affecting the anxiety relief consequences of vasopressin in anxious situations<sup>88</sup>.

The ancestral G allele of rs3021529 may also be under balancing selection and affect the regulation of the gene<sup>20</sup>, and has been linked to addiction<sup>90</sup>. The ancestral A allele of rs3759292 was found to be under directional selection<sup>20</sup>, but without any reported functional implications. The MHS G allele has been linked to heroin addiction<sup>91</sup> and also to ASD<sup>92</sup>. Other alleles have been also studied in the context of social behavior and related disorders, especially ASD, such as the MHS rs10877969(A)



182 (intron variant)<sup>92,93</sup>. Concerning *AVPR1B*, rs28676508(T) has been claimed to be involved in child onset aggression<sup>94</sup>. The  
 183 missense (arginine to histidine, position 364) variant rs28632197(T) has been associated with ASD diagnosis<sup>63</sup> and panic  
 184 disorder<sup>95</sup>. Finally, the G allele of rs33985287 protects against depressive moods in female children<sup>96</sup>.

**Table 2. Allele distribution on the *AVPR1A*-SNPs in the species studied. Ancestral: Also found in Macaques, Bonobos, Chimpanzees. Ancestral: also found in bonobos. Homo: Found in Archaic (Neanderthals, Denisovans) and Modern Humans. Abbreviations: MH: Modern Humans, MHS: Modern Human- Specific, Neand: Neanderthals, Den: Denisovan. B: Bonobos.**

| SNP        | Type     | Alleles | Pop.                         | Effect                                                          | Trial sample          | Other remarks                                    |
|------------|----------|---------|------------------------------|-----------------------------------------------------------------|-----------------------|--------------------------------------------------|
| rs1042615  | Exonic   | G       | Ancestral                    |                                                                 |                       | Missense. G/A in Bonobos, G in Chimpanzees       |
|            |          | A       | MHS+Den (also present in B.) | ASD <sup>86</sup>                                               | 205 (Finnish)         |                                                  |
| rs3803107  | 3' UTR   | G       | Ancestral                    |                                                                 |                       |                                                  |
|            |          | A       | Homo                         |                                                                 |                       |                                                  |
| rs10784339 | 3' UTR   | G       | Ancestral                    | Stress reactivity and substance addiction risk <sup>87,88</sup> | 852, 2231             |                                                  |
|            |          | C       | MHS                          |                                                                 |                       |                                                  |
| rs11174811 | 3' UTR   | C       | Ancestral                    | Substance addiction risk <sup>87,88</sup>                       | 852, 2231             | Possibly under balancing selection <sup>20</sup> |
|            |          |         |                              | Higher anxiety levels <sup>89</sup>                             | 1090 (German)         | Increases expression of <i>AVPR1A</i>            |
|            |          | A       | MHS                          | Aggression <sup>35</sup>                                        | 160 children          |                                                  |
| rs3021529  | Intronic | G       | Ancestral                    | Addiction <sup>90</sup>                                         | 1.050                 | Possibly under balancing selection <sup>20</sup> |
|            |          | A       | MHS                          |                                                                 |                       |                                                  |
| rs10877969 | Intronic | C       | Ancestral                    |                                                                 |                       | Except macaque (G)                               |
|            |          | A       | MHS                          | ASD <sup>92,93</sup>                                            | 151 Korean trios, 633 |                                                  |
| rs3759292  | Intronic | A       | Ancestral                    |                                                                 |                       | Positive selection <sup>20</sup>                 |
|            |          | G       | MHS                          |                                                                 |                       |                                                  |

### 185 3 Discussion

186 This study reports a total of 29 SNPs, 19 for *OXTR*, and 10 for *AVPR1A* and *AVPR1B*. Of these, 5 and 8 variants, respectively,  
 187 are MHS, which means 80% of the total of mutations in the case of *AVP* receptor genes. In addition, 3 variants (2 for *OXTR*,  
 188 1 for *AVPR*) are putative convergent sites between modern humans and bonobos. Only some of these SNPs (rs59190448,  
 189 rs3021529, rs11174811, and rs3759292) have been previously claimed to be under selection in modern humans. There is  
 190 evidence linking some of the SNPs identified here with prosocial behaviors (rs237917, rs2268490, rs237885 [section 2.1];  
 191 rs11174811 and rs33985287 [section 2.2]). The rest of the SNPs are either neutral, give mixed results, or confer risk of some  
 192 social behavior-disorder, mainly ASD. Some of the limitations of this study listed at the end of this article may contribute to  
 193 these results.

194 The clearest pattern we detect concerns *AVP* receptors, specifically, *AVPR1A*. 3 of the 5 MHS alleles (on rs11174811,  
 195 rs3021529, rs3759292, all of which have been associated with signals of selection) occur at very high frequencies in the global  
 196 population (Table S2). Of these, the A allele of rs11174811 shows the clearest change towards prosocial effects (the archaic  
 197 C allele is associated with negative phenotypes). Such a change from a more ancient allele linked to negative effects to a

**Table 3. Allele distribution on the *AVPR1B*-SNPs in the species studied. Ancestral: Also found in Macaques, Bonobos, Chimpanzees. Ancestral: also found in bonobos. Ancestral(CB) also found in Chimpanzees and Bonobos. Homo: Found in Archaic (Neanderthals, Denisovans) and Modern Humans. Abbreviations: MH: Modern Humans, MHS: Modern Human- Specific, Neand: Neanderthals, Den: Denisovan.**

| SNP        | Type   | Alleles | Pop.      | Effect                                            | Trial sample        | Other remarks                               |
|------------|--------|---------|-----------|---------------------------------------------------|---------------------|---------------------------------------------|
| rs28676508 | Exonic | C       | Ancestral |                                                   |                     | Synonymous.<br>C/G in Bonobo,<br>Chimpanzee |
|            |        | T       | MHS       | Child onset aggression <sup>94</sup>              | 177                 |                                             |
| rs28632197 | Exonic | C       | Ancestral |                                                   |                     | Missense. C/G<br>in Bonobo, Chim-<br>panzee |
|            |        | T       | MHS       | ASD <sup>63</sup><br>Panic disorder <sup>95</sup> | 207<br>186 (German) |                                             |
| rs33985287 | 3' UTR | C       | Ancestral | Protects against depressive moods <sup>96</sup>   | 464 (children)      | C/G in Bonobo,<br>Chimpanzee <sup>97</sup>  |
|            |        | T       | MHS       |                                                   |                     |                                             |

MHS allele linked to positive effects occur five times in our data: three times for *AVPR1A* (rs10784339 G>C, rs11174811 C>A and rs3021529 G>A), and two for *OXTR* (rs2268493 T>C and rs237917 C>T). But of these changes, only the *AVPR1A* rs11174811(A) reaches near-fixation in modern human populations. Comparative work on chimpanzees and bonobos<sup>98,99</sup> has highlighted the relevance of OXT and AVP receptors, especially *AVPR1A*, to capture differences in social cognition. Our analysis points in the same direction for archaic vs. modern humans.

Our analysis of *OXTR* yields more mixed results. Only one MHS mutations (on rs237917) is associated with positive effects. As a matter of fact, some alleles associated with negative phenotypes (rs59190448, rs237911) occur at high frequencies in several populations (Table S1). Other alleles that occur at high frequencies in most modern populations (rs9872310, rs4686302, rs2268493, rs33985287) lack clear phenotypical effects. While the change on rs4686302 could have boosted prosociality, our SNAP2 test showed that this site is most likely of no functional importance (82% accuracy).

Taken on its own, the evolutionary distribution of *OXTR* alleles could be taken to lend some support to hypotheses that argue for early changes in our lineage associated with prosocial behavior, unlike the changes on *AVPR1A* and *AVPR1B* that appear to be largely clustered in MHS. It is certainly compatible with hypotheses like the neurochemical hypothesis put forth in<sup>10</sup>, or the series of pro-social steps defended in<sup>6</sup>. Although these accounts stress the role of other hormones in early changes in hominins (dopamine in the case of<sup>10</sup> and  $\beta$ -endorphins for<sup>6</sup>), all of these hormones (especially oxytocin and dopamine) are known to interact and reinforce each other's effects<sup>16,100</sup>, so it could be that the early changes in *OXTR* identified here formed part of a broader set of changes, early in our clade, that set the stage for our prosocial profile.

Still, our results, especially those concerning the AVP receptors, also point to a distinct MHS social profile, which meshes well with the predictions of another working hypothesis that tries to account for modern humans' prosociality, the 'self-domestication hypothesis'. Advocates of this hypothesis<sup>14,15,101</sup>, build their case on certain physiological and behavioral traits that modern humans share with domesticated animals to argue for a significant turning point exclusive of *Homo sapiens* on the prosocial continuum. Although he does not endorse the logic of self-domestication,<sup>6</sup> also recognizes a special transition corresponding to the emergence of our species. Among these traits, digit ratio—a measure of prenatal androgen exposure<sup>102</sup>—suggests that Neanderthals had higher prenatal androgen exposure than modern humans<sup>103</sup>. Interestingly, one study reports that the association between digit ratio and cognitive empathy is contingent on one of the *OXTR* SNPs (rs53576) we mentioned in the Results, showing a three-way association between testosterone, oxytocin and empathy<sup>104</sup>. In the context of the self-domestication hypothesis, it is worth pointing out that both oxytocin and vasopressin receptors have been found to be under relaxed selective constraint in domesticated species<sup>105</sup>, and have been claimed to facilitate domestication<sup>106</sup>.

Our results could be used as a springboard for other studies delving into the differences in prosociality between bonobos and chimpanzees, as well as for those studies looking into evidence for convergent evolution in bonobos and modern humans in an attempt to explain their similarities in terms of prosociality<sup>107,108</sup>. We found three alleles that bonobos and modern humans share (rs237897(A), rs2228485(G) and rs1042615(A)), while we did not find any for modern humans and chimpanzees. Of these only rs1042615(A) is a missense mutation, while rs2228485(G) is synonymous and rs237897(A) an intronic variant. Even though missense mutations tend to attract more scientific interest, there is accumulating evidence that synonymous SNPs can affect splicing or mRNA stability, thereby altering gene products<sup>109</sup>. The association studies on these sites give mixed

233 results, so it would be interesting to pursue these sites' functionality further in a larger bonobo sample.

234 Among the Neanderthals we found that only the Altai carried two present-day alleles which have been associated with  
235 antisocial behavior, such as ASD, schizophrenia, (female) aggression (section 2.1) and *OXTR* mRNA expression in the brain<sup>25</sup>.  
236 If it is the case that these SNPs were frequent and not a fabric of the small sample of ancient human DNA currently available,  
237 it could mean that within the general Neanderthal population, Altai Neanderthals might have been less social than their  
238 conspecifics of other populations. A less prosocial attitude would be consistent with the high inbreeding rates found in the  
239 genome of the Altai Neanderthal<sup>11</sup>. According to<sup>110</sup>, Neanderthals were deeply subdivided into small population groups with  
240 scarce contact between them, which may have given them a social profile distinct from *Homo sapiens*.

241 SNPs present only in present-day humans and the Denisovan individual are of special interest considering the lack of  
242 archaeological information on Denisovans. According to paleogenomic studies, the rate of inbreeding of the sequenced  
243 individual is high, suggesting a very low population size alongside a two-fold increase of *H. Sapiens* competitor population  
244 size<sup>13</sup>. Some of these differences might be modulated by *OXTR* variation (rs1042778 and rs1042615 increase ASD-risk, while  
245 the first one also affects altruism positively (sections 2.1, 2.2)).

246 We acknowledge that there are limitations to this study. First, there are vastly more genomes currently available for the  
247 modern human population. While this may tip the balance towards modern human specificity in our study, the contrasting  
248 patterns obtained for oxytocin and vasopressin receptors suggest that our results cannot be fully reduced to the number of  
249 genomes available. Second, we have assumed that the SNPs studied would have the same (if any) effect on archaic humans or  
250 great apes, while their functionality has only been studied in modern humans. Since we are dealing with different genomic  
251 backgrounds, our interpretation remains tentative, although it is broadly compatible with information based on the fossil record  
252 and paleogenomic evidence (like inbreeding rates) or with behavioral differences between chimpanzees and bonobos. Also  
253 different plasticity windows have been hypothesized to play a role in susceptibility to both positive or negative influences<sup>111</sup>.  
254 Thus, it could be that the different ontogenetic trajectories that have been hypothesized for modern humans and Neanderthals<sup>112</sup>  
255 based on fossil evidence shaped a different susceptibility profile for them. Third, we have assumed that the ancient genomes that  
256 have been sequenced were representative of the general archaic population, something that might not be the case. Fourth, the  
257 allele-distribution data (Tables S1 and S2) we found in the literature for different modern human populations come from studies  
258 that have used different sample sizes, thus it might be that the high distribution of an allele is in reality a false positive. For this  
259 reason, we have limited our analysis of these tables to the Discussion. Fifth, all the sites that we considered here and labeled  
260 polymorphic in chimpanzees and bonobos (rs2228485, rs1042615, rs28676508, rs28632197, rs33985287) were in fact present  
261 with a 100% frequency in all the individuals of the SNV-data we used, but they differed from the allele present in the reference  
262 genomes. For this reason, in order to infer the ancestral state, we also made use of the gorilla and the orangutan genomes (apart  
263 from the macaque), which in all these sites showed the same variants as in the chimpanzee and bonobo reference genomes.  
264 Future research should use larger population samples to figure out the state of these sites. Sixth, our study may suffer from a  
265 publication bias where alleles with negative effects are overrepresented because of their clinical relevance. Finally, it could be  
266 said that our study favors oxytocin and vasopressin instead of other hormones, such as  $\beta$ -endorphins, cortisol, dopamine and  
267 testosterone, that have also been claimed to have been crucial in the evolution of our prosociality. While we have conveyed that  
268 there is enough theoretical ground to choose OXT and AVP for this study, we have also acknowledged that the role of oxytocin  
269 and vasopressin in prosociality depends on its interactions with other hormones that regulate social behavior.

## 270 4 Methods

271 We retrieved the *OXTR*, *AVPR1A* and *AVPR1B* DNA sequences from the following sources: the publicly available genomes of two  
272 Neanderthals and a Denisovan<sup>11-13</sup>, seven high-coverage present-day human genomes (San(HGDP01036), Mbuti(HGDP00982),  
273 Karitiana(HGDP01015), Yoruba(HGDP00936), Dinka(DNK07), French(HGDP00533) and Han(HGDP00775) genomes,  
274 originally sequenced for<sup>12</sup>), 1000 Genomes project<sup>13</sup>, manipulated through the Ensembl<sup>114</sup>, the chimpanzee (*Pan Troglodytes*)  
275 genome (CHIMP2.1.4 version), the bonobo (*Pan Paniscus*) genome (PANPAN1.1, Max-Planck Institute for Evolutionary  
276 Anthropology version) and the rhesus macaque (*Macaca Mulatta*) genome publicly provided by Ensembl<sup>114</sup>. We also used  
277 Single Nucleotide Variant (SNV)-data found in<sup>97</sup> for 13 bonobos (*Pan paniscus*) and 25 chimpanzees covering from west to  
278 east Africa (10 *Pan troglodytes ellioti*, 6 *Pan troglodytes schweinfurthii*, 4 *Pan troglodytes troglodytes*, 4 *Pan troglodytes verus*,  
279 and 1 chimpanzee hybrid).

280 Alignments were performed with the following tools: the built-in Ensembl tool<sup>114</sup>, the Max Planck for Evolutionary Anthro-  
281 pology Ancient Genome Browser (<https://bioinf.eva.mpg.de/jbrowse/>), Aliview<sup>115</sup>, Decipher for R<sup>116</sup>, Bedtools, MUSCLE<sup>117</sup>  
282 and MView<sup>118</sup>. We used all the genomic sequence of the genes we aligned, as provided in the standard layout of the files of  
283 the genomic sequences in the Ensembl database, namely with 600 bp upstream and downstream. We defined the genomic  
284 sequences in the same way when we extracted the gene sequences from the archaic genomes. We found no gaps in the gene  
285 sequences we studied in archaic humans (Altai and Vindija Neanderthals and Denisovans). We used the Integrative Genomics  
286 Viewer (IGV)<sup>119</sup> to search for the relevant SNP-positions in the bonobo and chimpanzee SNV-data.

287 We first aligned the modern human gene sequences of *OXTR*, *AVPR1A* and *AVPR1B* against each archaic human gene  
288 sequence and of the differences we found, we focused on those which are polymorphic in modern humans. We then aligned the  
289 modern human sequences *OXTR*, *AVPR1A* and *AVPR1B* against the chimpanzee, bonobo and macaque sequences in order to  
290 infer the ancestral state of previously identified sites (Table S5). The SNV-data from bonobos and chimpanzees were aligned  
291 to the *hg38*; we searched ad hoc for the locations of the SNPs of interest to account for variation in these sites. All alleles  
292 we studied were present with a 100% frequency in the SNV-data. When the allele found in the SNV-data was different from  
293 the allele present in the reference genomes (as in rs2228485, rs1042615, rs28676508, rs28632197, rs33985287), we reported  
294 both alleles and considered this site polymorphic. In order to infer the ancestral allele for these specific sites, we aligned the  
295 aforementioned SNPs with the orangutan (*Pongo abelii*) genome (PPYG2version) and the gorilla (*Gorilla gorilla gorilla*)  
296 genome (gorGor4 version) through Ensembl<sup>114</sup>. We used the same database when we wanted to assess the state of a specific  
297 variant in the rest of primates in the cases of convergence between modern humans and bonobo.

298 We then classified the alleles in evolutionary stages based on their distribution (presence or absence) in the different  
299 species/populations studied (e.g. Homo-specific, modern human-specific, Altai Neanderthal-specific). We then reviewed  
300 exhaustively the clinical significance of each one of these SNPs in present-day human populations. The literature filtering was  
301 performed through the Viewer tool of the National Center for Biotechnology Information<sup>120</sup>. SNPs not known to be related to  
302 social cognition, social disorders or any other relevant information were discarded. Specifically, of the 3160 single nucleotide  
303 variants identified on the *OXTR*, only 55 are mentioned in the literature. Of those, we included 19 in our study (34,54%). Of  
304 the 1375 single nucleotide variants identified on *AVPR1A*, 10 are mentioned in the literature. Of those, we included 7 (70%).  
305 And of the 988 single nucleotide variants identified on *AVPR1B*, 14 are mentioned in the literature. Of those, we included 3  
306 (21,42%). The reader can find a full list of the SNPs that have been identified in modern humans on the genes studied, as well  
307 as a list of the archaic-specific polymorphisms known to date in the Supplementary Material (Tables S3-4).

308 In addition, we performed a transcription factor binding site prediction test using Lasagna2.0<sup>121</sup>, and functional effects tests  
309 of exon variants with SNAP2<sup>122</sup> to all the variant-changes we had identified between modern and archaic human sequences.  
310 The Lasagna2.0 test did not yield any results.

311 We also multialigned all the gene sequences (*OXTR*, *AVPR1A* and *AVPR1B*) using only the reference genome sequences  
312 of the species included in the study: Human (GRCh38.p12), Neanderthal and Denisovan<sup>11-13</sup>, the chimpanzee genome  
313 (Pan\_tro.3.0), the bonobo genome (PANPAN1.1, Max-Planck Institute for Evolutionary Anthropology version) and the rhesus  
314 macaque genome (Mmul.8.0.1) publicly provided by Ensembl<sup>114</sup> (Suppl. Material).

315 We also included in our analysis several *AVPR1A*-microsatellites that have been associated with social-related phenotypes  
316 in the literature. More specifically we added as a sequence-search track the modern human RS3-(CT)<sub>4</sub>TT(CT)<sub>8</sub>(GT)<sub>24</sub>, RS1-  
317 (GATA)<sub>14</sub>, GT<sub>25</sub> and the intronic AVR-(GT)<sub>14</sub>(GA)<sub>13</sub>(A)<sub>8</sub> microsatellite-sequences on the jbrowser (<https://bioinf.eva.mpg.de/jbrowser/>)  
318 and on the Integrative Genomics Viewer and looked for any possible differences in the Neanderthal (Altai and Vindija) and the  
319 Denisovan sequences. We did not find any changes in these regions, hence we did not make any further mention to this in the  
320 Results.

## 321 Acknowledgements

322 We thank Thomas O'Rourke for comments on the manuscript. We also thank Erich D. Jarvis and Evan E. Eichler for guidance  
323 on primate variation data.

## 324 Funding statement

325 CB acknowledges the financial support from the Spanish Ministry of Economy and Competitiveness/FEDER funds (grant  
326 FFI2016-78034-C2-1-P), a Marie Curie International Reintegration Grant from the European Union (PIRG-GA-2009-256413),  
327 research funds from the Fundació Bosch i Gimpera, from the Generalitat de Catalunya (2017-SGR-341), and the MEXT/JSPS  
328 Grant-in-Aid for Scientific Research on Innovative Areas 4903 (Evolinguistics: JP17H06379). CTh acknowledges support from  
329 the Generalitat de Catalunya in the form of a doctoral (FI) fellowship. AA acknowledges financial support from the Spanish  
330 Ministry of Economy and Competitiveness and the European Social Fund (BES-2017-080366).

## 331 Author Contributions Statement

332 CTh conceptualized and designed the study. AA ran all the tests, did the literature mining, generated the figures, and tables;  
333 CTh and AA ran the multialignment and handled the primate SNV-data; CB coordinated the study; CTh, AA and CB wrote the  
334 paper.



## Data availability statement

All data generated or analysed during this study are included in this published article (and its Supplementary Information files).

## Additional Information

### Competing interests

There is NO Competing financial or non-financial interest.

## References

1. Meyer-Lindenberg, A., Domes, G., Kirsch, P. & Heinrichs, M. Oxytocin and vasopressin in the human brain: social neuropeptides for translational medicine. *Nat. Rev. Neurosci.* **12**, 524–538 (2011).
2. Hoyle, C. H. Neuropeptide families and their receptors: evolutionary perspectives. *Brain Res.* **848**, 1–25 (1999). URL [https://doi.org/10.1016/s0006-8993\(99\)01975-7](https://doi.org/10.1016/s0006-8993(99)01975-7). DOI 10.1016/s0006-8993(99)01975-7.
3. Song, Z. & Albers, H. E. Cross-talk among oxytocin and arginine-vasopressin receptors: Relevance for basic and clinical studies of the brain and periphery. *Front. Neuroendocrinol.* (2017). URL <http://www.sciencedirect.com/science/article/pii/S009130221730064X>. DOI <https://doi.org/10.1016/j.yfrne.2017.10.004>.
4. Donaldson, Z. R. & Young, L. J. Oxytocin, vasopressin, and the neurogenetics of sociality. *Sci.* **322**, 900–904 (2008). URL <https://doi.org/10.1126/science.1158668>. DOI 10.1126/science.1158668.
5. Israel, S. *et al.* Molecular genetic studies of the arginine vasopressin 1a receptor (avpr1a) and the oxytocin receptor (oxtr) in human behaviour: from autism to altruism with some notes in between. *Elsevier* **170**, 435 – 449 (2008). URL <http://www.sciencedirect.com/science/article/pii/S0079612308004342>. DOI [https://doi.org/10.1016/S0079-6123\(08\)00434-2](https://doi.org/10.1016/S0079-6123(08)00434-2).
6. Dunbar, R. I. M. *Human evolution* (Oxford University Press, 2016).
7. Tomasello, M. The ultra-social animal. *Eur. J. Soc. Psychol.* **44**, 187–194 (2014). URL <https://doi.org/10.1002/ejsp.2015>. DOI 10.1002/ejsp.2015.
8. Theofanopoulou, C., Boeckx, C. & Jarvis, E. D. A hypothesis on a role of oxytocin in the social mechanisms of speech and vocal learning. *Proc. Royal Soc. B: Biol. Sci.* **284**, 20170988 (2017). URL <https://doi.org/10.1098/rspb.2017.0988>. DOI 10.1098/rspb.2017.0988.
9. Staes, N., Bradley, B. J., Hopkins, W. D. & Sherwood, C. C. Genetic signatures of socio-communicative abilities in primates. *Curr. Opin. Behav. Sci.* **21**, 33–38 (2018). URL <https://doi.org/10.1016/j.cobeha.2017.11.013>. DOI 10.1016/j.cobeha.2017.11.013.
10. Raghanti, M. A. *et al.* A neurochemical hypothesis for the origin of hominids. *Proc. Natl. Acad. Sci.* 201719666 (2018). URL <https://doi.org/10.1073/pnas.1719666115>. DOI 10.1073/pnas.1719666115.
11. Prüfer, K. *et al.* The complete genome sequence of a neanderthal from the altai mountains. *Nat.* **505**, 43–49 (2014). URL <https://doi.org/10.1038/nature12886>. DOI 10.1038/nature12886.
12. Prüfer, K. *et al.* A high-coverage neandertal genome from vindija cave in croatia. *Sci.* (2017). URL <http://science.sciencemag.org/content/early/2017/10/04/science.aao1887>. DOI 10.1126/science.aao1887. <http://science.sciencemag.org/content/early/2017/10/04/science.aao1887.full.pdf>.
13. Meyer, M. *et al.* A high-coverage genome sequence from an archaic denisovan individual. *Sci.* **338**, 222–226 (2012). URL <http://science.sciencemag.org/content/338/6104/222>. DOI 10.1126/science.1224344. <http://science.sciencemag.org/content/338/6104/222.full.pdf>.
14. Hare, B. Survival of the friendliest: Homo sapiens evolved via selection for prosociality. *Annu. Rev. Psychol.* **68**, 155–186 (2017). URL <https://doi.org/10.1146/annurev-psych-010416-044201>. DOI 10.1146/annurev-psych-010416-044201. PMID: 27732802, <https://doi.org/10.1146/annurev-psych-010416-044201>.
15. Theofanopoulou, C. *et al.* Self-domestication in homo sapiens: Insights from comparative genomics. *PLOS ONE* **12**, e0185306 (2017). URL <https://doi.org/10.1371/journal.pone.0185306>. DOI 10.1371/journal.pone.0185306.
16. Pearce, E., Wlodarski, R., Machin, A. & Dunbar, R. I. M. Variation in the beta-endorphin, oxytocin, and dopamine receptor genes is associated with different dimensions of human sociality. *Proc. Natl. Acad. Sci.* **114**, 5300–5305 (2017). URL <https://doi.org/10.1073/pnas.1700712114>. DOI 10.1073/pnas.1700712114.

- 382 **17.** Kuhlwilm, M. & Boeckx, C. Genetic differences between humans and other hominins contribute to the "human  
383 condition". *bioRxiv* (2018). URL <https://www.biorxiv.org/content/early/2018/04/11/298950>.  
384 DOI 10.1101/298950. <https://www.biorxiv.org/content/early/2018/04/11/298950.full.pdf>.
- 385 **18.** Wade, M., Hoffmann, T. J. & Jenkins, J. M. Gene-environment interaction between the oxytocin receptor (OXTR)  
386 gene and parenting behaviour on children's theory of mind. *Soc. Cogn. Affect. Neurosci.* **10**, 1749–1757 (2014). DOI  
387 10.1093/scan/nsv064.
- 388 **19.** Kawamura, Y. *et al.* The association between oxytocin receptor gene (OXTR) polymorphisms and affective temperaments,  
389 as measured by TEMPS-A. *J. Affect. Disord.* **127**, 31–37 (2010). URL [http://dx.doi.org/10.1016/j.jad.](http://dx.doi.org/10.1016/j.jad.2010.04.014)  
390 [2010.04.014](http://dx.doi.org/10.1016/j.jad.2010.04.014). DOI 10.1016/j.jad.2010.04.014.
- 391 **20.** Schaschl, H. *et al.* Signatures of positive selection in the cis-regulatory sequences of the human oxytocin receptor  
392 (OXTR) and arginine vasopressin receptor 1a (AVPR1A) genes. *BMC Evol. Biol.* **15**, 85 (2015). URL [http://www.](http://www.biomedcentral.com/1471-2148/15/85)  
393 [biomedcentral.com/1471-2148/15/85](http://www.biomedcentral.com/1471-2148/15/85). DOI 10.1186/s12862-015-0372-7.
- 394 **21.** Myers, A. J. *et al.* Variation in the oxytocin receptor gene is associated with increased risk for anxiety, stress and  
395 depression in individuals with a history of exposure to early life stress. *J Psychiatr Res* **59**, 93–100 (2014). DOI  
396 10.1016/j.jpsychires.2014.08.021. VARIATION.
- 397 **22.** Wu, N., Li, Z. & Su, Y. The association between oxytocin receptor gene polymorphism (OXTR) and trait empathy.  
398 *J. Affect. Disord.* **138**, 468–472 (2012). URL <http://dx.doi.org/10.1016/j.jad.2012.01.009>. DOI  
399 10.1016/j.jad.2012.01.009.
- 400 **23.** Wu, N. & Su, Y. Variations in the oxtr gene and prosocial behavior: Moderating effects of situational factors. *Integr.*  
401 *zoology* (2018).
- 402 **24.** Kang, J. I., Kim, H. W., Kim, C. H., Hwang, E. H. & Kim, S. J. Oxytocin receptor gene polymorphisms exert a modulating  
403 effect on the onset age in patients with obsessive-compulsive disorder. *Psychoneuroendocrinology* **86**, 45–52 (2017).
- 404 **25.** Park, J. *et al.* Evidence that genetic variation in the oxytocin receptor (OXTR) gene influences social cognition  
405 in ADHD. *Prog. Neuro-Psychopharmacology Biol. Psychiatry* **34**, 697–702 (2010). URL [http://www.ncbi.](http://www.ncbi.nlm.nih.gov/pubmed/20347913)  
406 [nlm.nih.gov/pubmed/20347913](http://www.ncbi.nlm.nih.gov/pubmed/20347913)<http://dx.doi.org/10.1016/j.pnpbp.2010.03.029>. DOI  
407 10.1016/j.pnpbp.2010.03.029.
- 408 **26.** Baribeau, D. A. *et al.* Oxytocin receptor polymorphisms are differentially associated with social abilities across  
409 neurodevelopmental disorders. *Sci. reports* **7**, 11618 (2017).
- 410 **27.** Lerer, E. *et al.* Association between the oxytocin receptor (OXTR) gene and autism: Relationship to Vineland Adaptive  
411 Behavior Scales and cognition. *Mol. Psychiatry* **13**, 980–988 (2008). DOI 10.1038/sj.mp.4002087.
- 412 **28.** Schneiderman, I., Kanat-Maymon, Y., Ebstein, R. P. & Feldman, R. Cumulative risk on the oxytocin receptor gene  
413 (OXTR) underpins empathic communication difficulties at the first stages of romantic love. *Soc. Cogn. Affect. Neurosci.*  
414 **9**, 1524–1529 (2014). DOI 10.1093/scan/nst142.
- 415 **29.** Tansey, K. E. *et al.* Oxytocin receptor (OXTR) does not play a major role in the aetiology of autism: Genetic and molecular  
416 studies. *Neurosci. Lett.* **474**, 163–167 (2010). URL <http://dx.doi.org/10.1016/j.neulet.2010.03.035>.  
417 DOI 10.1016/j.neulet.2010.03.035.
- 418 **30.** Israel, S. *et al.* The oxytocin receptor (OXTR) contributes to prosocial fund allocations in the Dictator Game and the  
419 social value orientations task. *PLoS One* **4** (2009). DOI 10.1371/journal.pone.0005535.
- 420 **31.** Chang, S.-C. *et al.* Are genetic variations in oxtr, avpr1a, and cd38 genes important to social integration? results from  
421 two large us cohorts. *Psychoneuroendocrinology* **39**, 257–268 (2014).
- 422 **32.** Harrison, A. J., Gamsiz, E. D., Berkowitz, I. C., Nagpal, S. & Jerskey, B. A. Genetic variation in the oxytocin receptor  
423 gene is associated with a social phenotype in autism spectrum disorders. *Am. J. Med. Genet. Part B: Neuropsychiatr.*  
424 *Genet.* **168**, 720–729 (2015).
- 425 **33.** Smearman, E. L. *et al.* Oxytocin receptor genetic and epigenetic variations: association with child abuse and adult  
426 psychiatric symptoms. *Child development* **87**, 122–134 (2016).
- 427 **34.** Sugar, C. A. & Green, M. F. Cognitive Performance in Individuals With Schizophrenia. *Schizophr Res* **159**, 353–357  
428 (2015). DOI 10.1016/j.schres.2014.09.006. Associations.
- 429 **35.** Malik, A. I., Zai, C. C., Abu, Z., Nowrouzi, B. & Beitchman, J. H. The role of oxytocin and oxytocin receptor gene variants  
430 in childhood-onset aggression. *Genes, Brain Behav.* **11**, 545–551 (2012). DOI 10.1111/j.1601-183X.2012.00776.x.



- 431 **36.** Liu, X. *et al.* Association of the oxytocin receptor (OXTR) gene polymorphisms with autism spectrum disorder (ASD) in  
432 the Japanese population. *J. Hum. Genet.* **55**, 137–141 (2010). URL [http://dx.doi.org/10.1038/jhg.2009.](http://dx.doi.org/10.1038/jhg.2009.140)  
433 [140](http://dx.doi.org/10.1038/jhg.2009.140). DOI 10.1038/jhg.2009.140.
- 434 **37.** Montag, C. *et al.* Association between Oxytocin Receptor Gene Polymorphisms and Self-Rated 'Empathic Concern' in  
435 Schizophrenia. *PLoS One* **7** (2012). DOI 10.1371/journal.pone.0051882.
- 436 **38.** Zhang, Y. *et al.* Genetic variants in oxytocin receptor gene (oxtr) and childhood physical abuse collaborate to modify the  
437 risk of aggression in chinese adolescents. *J. affective disorders* **229**, 105–110 (2018).
- 438 **39.** Feldman, R. *et al.* Sensitive parenting is associated with plasma oxytocin and polymorphisms in the OXTR and CD38  
439 genes. *Biol. Psychiatry* **72**, 175–181 (2012). URL <https://doi.org/10.1016/j.biopsych.2011.12.025>.  
440 DOI 10.1016/j.biopsych.2011.12.025.
- 441 **40.** Ribeiro, L. d. O. P. *et al.* Evidence for association between oxtr gene and asd clinical phenotypes. *J. Mol. Neurosci.* 1–9  
442 (2018).
- 443 **41.** Campbell, D. B. *et al.* Association of oxytocin receptor (OXTR) gene variants with multiple phenotype domains of autism  
444 spectrum disorder. *J. Neurodev. Disord.* **3**, 101–112 (2011). DOI 10.1007/s11689-010-9071-2.
- 445 **42.** Apicella, C. L. *et al.* No Association between Oxytocin Receptor (OXTR) Gene Polymorphisms and Experimentally  
446 Elicited Social Preferences. *PLoS One* **5**, 1–8 (2010). URL [https://doi.org/10.1371/journal.pone.](https://doi.org/10.1371/journal.pone.0011153)  
447 [0011153](https://doi.org/10.1371/journal.pone.0011153). DOI 10.1371/journal.pone.0011153.
- 448 **43.** Dobewall, H. *et al.* Oxytocin receptor gene (oxtr) variant rs1042778 moderates the influence of family environment on  
449 changes in perceived social support over time. *J. affective disorders* **235**, 480–488 (2018).
- 450 **44.** Isgett, S. F., Algoe, S. B., Boulton, A. J., Way, B. M. & Fredrickson, B. L. Common variant in oxtr predicts growth in  
451 positive emotions from loving-kindness training. *Psychoneuroendocrinology* **73**, 244–251 (2016).
- 452 **45.** Wu, S. *et al.* Positive association of the oxytocin receptor gene (OXTR) with autism in the Chinese Han population. *Biol.*  
453 *Psychiatry* **58**, 74–77 (2005). DOI 10.1016/j.biopsych.2005.03.013.
- 454 **46.** Loparo, D. & Waldman, I. D. The oxytocin receptor gene (OXTR) is associated with autism spectrum disorder: a  
455 meta-analysis. *Mol. Psychiatry* **20**, 640–646 (2014). URL <http://dx.doi.org/10.1038/mp.2014.77>. DOI  
456 10.1038/mp.2014.77.
- 457 **47.** Jacob, S. *et al.* Association of the oxytocin receptor gene (OXTR) in caucasian children and adolescents with  
458 autism. *Neurosci. Lett.* **417**, 6–9 (2007). URL <https://doi.org/10.1016/j.neulet.2007.02.001>. DOI  
459 10.1016/j.neulet.2007.02.001.
- 460 **48.** Smearman, E. L. *et al.* Oxytocin receptor genetic and epigenetic variation: association with child abuse and adult  
461 psychiatric symptoms. *Child Dev.* **87**, 122–134 (2016). DOI 10.1111/cdev.12493. [15334406](https://doi.org/10.1111/cdev.12493).
- 462 **49.** Flasbeck, V., Moser, D., Kumsta, R. & Brüne, M. The oxtr single-nucleotide polymorphism rs53576 moderates the impact  
463 of childhood maltreatment on empathy for social pain in female participants: evidence for differential susceptibility.  
464 *Front. psychiatry* **9** (2018).
- 465 **50.** Tombeau Cost, K. *et al.* Thinking and doing: the effects of dopamine and oxytocin genes and executive function on  
466 mothering behaviours. *Genes, Brain Behav.* **16**, 285–295 (2017).
- 467 **51.** Chen, F. S. & Johnson, S. C. Oxytocin receptor (OXTR) polymorphisms and attachment in human infants. *Front. Psychol.*  
468 **2**, 1–6 (2011). DOI 10.3389/fpsyg.2011.00200.
- 469 **52.** Yang, S. *et al.* Serum oxytocin levels and an oxytocin receptor gene polymorphism (rs2254298) indicate social deficits in  
470 children and adolescents with autism spectrum disorders. *Front. neuroscience* **11**, 221 (2017).
- 471 **53.** Cattaneo, Z. *et al.* Congenital prosopagnosia is associated with a genetic variation in the oxytocin receptor (oxtr) gene:  
472 An exploratory study. *Neurosci.* **339**, 162–173 (2016).
- 473 **54.** Shao, D. *et al.* Effect of the interaction between oxytocin receptor gene polymorphism (rs53576) and stressful life events  
474 on aggression in chinese han adolescents. *Psychoneuroendocrinology* (2018).
- 475 **55.** Kim, H. W., Kang, J. I., An, S. K. & Kim, S. J. Oxytocin receptor gene variants are associated with emotion recognition  
476 and resilience, but not with false-belief reasoning performance in healthy young korean volunteers. *CNS neuroscience &*  
477 *therapeutics* (2018).
- 478 **56.** Schiele, M. A. *et al.* Oxytocin receptor gene variation, behavioural inhibition, and adult separation anxiety: Role in  
479 complicated grief. *The World J. Biol. Psychiatry* 1–9 (2018).

- 480 57. Andreou, D., Comasco, E., Åslund, C., Nilsson, K. W. & Hodgins, S. Maltreatment, the oxytocin receptor gene, and  
481 conduct problems among male and female teenagers. *Front. human neuroscience* **12**, 112 (2018).
- 482 58. Inoue, H. *et al.* Association between the oxytocin receptor gene and amygdalar volume in healthy adults. *Biol.*  
483 *Psychiatry* **68**, 1066–1072 (2010). URL <http://dx.doi.org/10.1016/j.biopsych.2010.07.019>. DOI  
484 10.1016/j.biopsych.2010.07.019.
- 485 59. Marusak, H. A. *et al.* Amygdala responses to salient social cues vary with oxytocin receptor genotype in youth.  
486 *Neuropsychol.* **79**, 1–9 (2015).
- 487 60. Tost, H. *et al.* Neurogenetic effects of OXTR rs2254298 in the extended limbic system of healthy caucasian adults. *Biol.*  
488 *Psychiatry* **70**, 37–39 (2011). DOI 10.1016/j.biopsych.2011.06.034.
- 489 61. Nishina, K. *et al.* Association of the oxytocin receptor gene with attitudinal trust: role of amygdala volume. *Soc. cognitive*  
490 *affective neuroscience* **1**, 7 (2018).
- 491 62. Holmqvist Jämsen *et al.* Associations Between Vocal Symptoms and Genetic Variants in the Oxytocin Receptor and  
492 Arginine Vasopressin 1A Receptor Gene. *J. Speech Lang. Hear. Res.* **60**, 1843 (2017).
- 493 63. Francis, S. M. *et al.* ASD and genetic associations with receptors for oxytocin and vasopressin-AVPR1A, AVPR1B, and  
494 OXTR. *Front. Neurosci.* **10**, 1–10 (2016). DOI 10.3389/fnins.2016.00516.
- 495 64. Napoli, A. D., Warrier, V., Baron-Cohen, S. & Chakrabarti, B. Genetic variation in the oxytocin receptor (OXTR)  
496 gene is associated with asperger syndrome. *Mol. Autism* **5**, 48 (2014). URL [https://doi.org/10.1186/](https://doi.org/10.1186/2040-2392-5-48)  
497 [2040-2392-5-48](https://doi.org/10.1186/2040-2392-5-48). DOI 10.1186/2040-2392-5-48.
- 498 65. Yrigollen, C. M. *et al.* Genes controlling affiliative behavior as candidate genes for autism. *Biol. Psy-*  
499 *chiatry* **63**, 911–916 (2008). URL <https://doi.org/10.1016/j.biopsych.2007.11.015>. DOI  
500 10.1016/j.biopsych.2007.11.015.
- 501 66. Davis, M. C. *et al.* Associations between oxytocin receptor genotypes and social cognitive performance in individuals  
502 with schizophrenia. *Schizophr. Res.* **159**, 353–357 (2014). URL [https://doi.org/10.1016/j.schres.2014.](https://doi.org/10.1016/j.schres.2014.09.006)  
503 [09.006](https://doi.org/10.1016/j.schres.2014.09.006). DOI 10.1016/j.schres.2014.09.006.
- 504 67. Ayaz, A. B. *et al.* Oxytocin system social function impacts in children with attention-deficit/hyperactivity disorder. *Am. J.*  
505 *Med. Genet. Part B Neuropsychiatr. Genet.* **168**, 609–616 (2015). DOI 10.1002/ajmg.b.32343.
- 506 68. Damiano, C. R. *et al.* Association between the oxytocin receptor (OXTR) gene and mesolimbic responses to rewards.  
507 *Mol. Autism* **5**, 7 (2014). URL [http://molecularautism.biomedcentral.com/articles/10.1186/](http://molecularautism.biomedcentral.com/articles/10.1186/2040-2392-5-7)  
508 [2040-2392-5-7](http://molecularautism.biomedcentral.com/articles/10.1186/2040-2392-5-7). DOI 10.1186/2040-2392-5-7.
- 509 69. Bakermans-Kranenburg, M. J. & Van Ijzendoorn, M. H. A sociability gene' Meta-Analysis of oxytocin receptor genotype  
510 effects in humans. *Psychiatr. Genet.* **24**, 45–51 (2014). DOI 10.1097/YPG.0b013e3283643684.
- 511 70. Bernhard, R. M. *et al.* Variation in the oxytocin receptor gene ( *<i>OXTR</i>* ) is associated with differences  
512 in moral judgment. *Soc. Cogn. Affect. Neurosci.* nsw103 (2016). URL [https://academic.oup.com/scan/](https://academic.oup.com/scan/article-lookup/doi/10.1093/scan/nsw103)  
513 [article-lookup/doi/10.1093/scan/nsw103](https://academic.oup.com/scan/article-lookup/doi/10.1093/scan/nsw103). DOI 10.1093/scan/nsw103.
- 514 71. Tabak, B. A., McCullough, M. E., Carver, C. S., Pedersen, E. J. & Cuccaro, M. L. Variation in oxytocin receptor gene  
515 (OXTR) polymorphisms is associated with emotional and behavioral reactions to betrayal. *Soc. Cogn. Affect. Neurosci.* **9**,  
516 810–816 (2013). DOI 10.1093/scan/nst042.
- 517 72. Chang, S.-C. *et al.* Are genetic variations in OXTR, AVPR1a, and CD38 genes important to social integration? results  
518 from two large u.s. cohorts. *Psychoneuroendocrinology* **39**, 257–268 (2014). URL [https://doi.org/10.1016/j.](https://doi.org/10.1016/j.psyneuen.2013.09.024)  
519 [psyneuen.2013.09.024](https://doi.org/10.1016/j.psyneuen.2013.09.024). DOI 10.1016/j.psyneuen.2013.09.024.
- 520 73. Kim, Y.-R., Kim, J.-H., Kim, C.-H., Shin, J. G. & Treasure, J. Association between the Oxytocin Receptor Gene  
521 Polymorphism (rs53576) and Bulimia Nervosa. *Eur. Eat. Disord. Rev.* **23**, 171–178 (2015). URL [http://doi.](http://doi.wiley.com/10.1002/erv.2354)  
522 [wiley.com/10.1002/erv.2354](http://doi.wiley.com/10.1002/erv.2354). DOI 10.1002/erv.2354.
- 523 74. Chen, F. S. *et al.* Common oxytocin receptor gene (OXTR) polymorphism and social support interact to reduce  
524 stress in humans. *Proc. Natl. Acad. Sci.* **108**, 19937–19942 (2011). URL [https://doi.org/10.1073/pnas.](https://doi.org/10.1073/pnas.1113079108)  
525 [1113079108](https://doi.org/10.1073/pnas.1113079108). DOI 10.1073/pnas.1113079108.
- 526 75. Costa, B. *et al.* Oxytocin receptor polymorphisms and adult attachment style in patients with depression. *Psychoneuroen-*  
527 *docrinology* **34**, 1506–1514 (2009). URL <https://doi.org/10.1016/j.psyneuen.2009.05.006>. DOI  
528 10.1016/j.psyneuen.2009.05.006.

- 529 **76.** Feng, C. *et al.* A common oxytocin receptor gene (OXTR) polymorphism modulates intranasal oxytocin effects on the  
530 neural response to social cooperation in humans. *Genes, Brain Behav.* **14**, 516–525 (2015). DOI 10.1111/gbb.12234.
- 531 **77.** Laursen, H. R. *et al.* Variation in the oxytocin receptor gene is associated with behavioral and neural correlates of  
532 empathic accuracy. *Front. Behav. Neurosci.* **8** (2014). URL <https://doi.org/10.3389/fnbeh.2014.00423>.  
533 DOI 10.3389/fnbeh.2014.00423.
- 534 **78.** Rodrigues, S. M., Saslow, L. R., Garcia, N., John, O. P. & Keltner, D. Oxytocin receptor genetic variation relates to  
535 empathy and stress reactivity in humans. *Proc. Natl. Acad. Sci.* **106**, 21437–21441 (2009). URL <https://doi.org/10.1073/pnas.0909579106>.  
536 DOI 10.1073/pnas.0909579106.
- 537 **79.** Saphire-Bernstein, S., Way, B. M., Kim, H. S., Sherman, D. K. & Taylor, S. E. Oxytocin receptor gene (OXTR) is related  
538 to psychological resources. *Proc. Natl. Acad. Sci.* **108**, 15118–15122 (2011). URL <https://doi.org/10.1073/pnas.1113137108>.  
539 DOI 10.1073/pnas.1113137108.
- 540 **80.** McQuaid, R. J., McInnis, O. A., Stead, J. D., Matheson, K. & Anisman, H. A paradoxical association of an oxytocin  
541 receptor gene polymorphism: early-life adversity and vulnerability to depression. *Front. Neurosci.* **7** (2013). URL  
542 <https://doi.org/10.3389/fnins.2013.00128>. DOI 10.3389/fnins.2013.00128.
- 543 **81.** Chen, F. S. *et al.* Genetic modulation of oxytocin sensitivity: a pharmacogenetic approach. *Transl. Psychiatry* **5**,  
544 e664–e664 (2015). URL <https://doi.org/10.1038/tp.2015.163>. DOI 10.1038/tp.2015.163.
- 545 **82.** Lucht, M. J. *et al.* Associations between the oxytocin receptor gene (OXTR) and affect, loneliness and intelligence in  
546 normal subjects. *Prog. Neuro-Psychopharmacology Biol. Psychiatry* **33**, 860–866 (2009). URL <http://dx.doi.org/10.1016/j.pnpbp.2009.04.004>.  
547 DOI 10.1016/j.pnpbp.2009.04.004.
- 548 **83.** Lucht, M. J. *et al.* Associations between the oxytocin receptor gene (OXTR) and "mind-reading" in humans - An  
549 exploratory study. *Nord. J. Psychiatry* **67**, 15–21 (2013). URL <http://www.tandfonline.com/doi/full/10.3109/08039488.2012.700731>.  
550 DOI 10.3109/08039488.2012.700731.
- 551 **84.** Kalyoncu, T., Özbaran, B., Köse, S. & Onay, H. Variation in the oxytocin receptor gene is associated with social cognition  
552 and adhd. *J. attention disorders* 1087054717706757 (2017).
- 553 **85.** Tansey, K. E. *et al.* Functionality of promoter microsatellites of arginine vasopressin receptor 1a (AVPR1a): implications  
554 for autism. *Mol. Autism* **2**, 3 (2011). URL <https://doi.org/10.1186/2040-2392-2-3>. DOI 10.1186/2040-  
555 2392-2-3.
- 556 **86.** Kantojärvi, K. *et al.* Association and promoter analysis of AVPR1a in finnish autism families. *Autism Res.* **8**, 634–639  
557 (2015). URL <https://doi.org/10.1002/aur.1473>. DOI 10.1002/aur.1473.
- 558 **87.** Levran, O. *et al.* Stress-related genes and heroin addiction: A role for a functional FKBP5 haplotype. *Psychoneu-*  
559 *roendocrinology* **45**, 67–76 (2014). URL <https://doi.org/10.1016/j.psyneuen.2014.03.017>. DOI  
560 10.1016/j.psyneuen.2014.03.017.
- 561 **88.** Maher, B. S. *et al.* The AVPR1a gene and substance use disorders: Association, replication, and functional evidence.  
562 *Biol. Psychiatry* **70**, 519–527 (2011). URL <https://doi.org/10.1016/j.biopsych.2011.02.023>. DOI  
563 10.1016/j.biopsych.2011.02.023.
- 564 **89.** Reuter, M., Cooper, A. J., Smillie, L. D., Markett, S. & Montag, C. A new measure for the revised reinforcement  
565 sensitivity theory: psychometric criteria and genetic validation. *Front. Syst. Neurosci.* **9** (2015). URL <https://doi.org/10.3389/fnsys.2015.00038>. DOI 10.3389/fnsys.2015.00038.  
566
- 567 **90.** Saccone, S. F. *et al.* Cholinergic nicotinic receptor genes implicated in a nicotine dependence association study targeting  
568 348 candidate genes with 3713 SNPs. *Hum. Mol. Genet.* **16**, 36–49 (2006). URL <https://doi.org/10.1093/hmg/ddl438>. DOI 10.1093/hmg/ddl438.  
569
- 570 **91.** Levran, O. *et al.* Heroin addiction in african americans: a hypothesis-driven association study. *Genes, Brain Behav.*  
571 **8**, 531–540 (2009). URL <https://doi.org/10.1111/j.1601-183x.2009.00501.x>. DOI 10.1111/j.1601-  
572 183x.2009.00501.x.
- 573 **92.** Yang, S. Y. *et al.* Association study between single nucleotide polymorphisms in promoter region of AVPR1a and korean  
574 autism spectrum disorders. *Neurosci. Lett.* **479**, 197–200 (2010). URL <https://doi.org/10.1016/j.neulet.2010.05.050>.  
575 DOI 10.1016/j.neulet.2010.05.050.
- 576 **93.** Yang, S. Y. *et al.* Replicative genetic association study between functional polymorphisms in AVPR1a and social behavior  
577 scales of autism spectrum disorder in the korean population. *Mol. Autism* **8** (2017). URL <https://doi.org/10.1186/s13229-017-0161-9>. DOI 10.1186/s13229-017-0161-9.  
578

- 579 **94.** Zai, C. C. *et al.* Possible genetic association between vasopressin receptor 1b and child aggression. *Psychi-*  
580 *atry Res.* **200**, 784–788 (2012). URL <https://doi.org/10.1016/j.psychres.2012.07.031>. DOI  
581 10.1016/j.psychres.2012.07.031.
- 582 **95.** Keck, M. E. *et al.* Combined effects of exonic polymorphisms in CRHR1 and AVPR1b genes in a case/control study  
583 for panic disorder. *Am. J. Med. Genet. Part B: Neuropsychiatr. Genet.* **147B**, 1196–1204 (2008). URL <https://doi.org/10.1002/ajmg.b.30750>. DOI 10.1002/ajmg.b.30750.  
584
- 585 **96.** Dempster, E. L. Evidence of an association between the vasopressin v1b receptor gene (AVPR1b) and childhood-onset  
586 mood disorders. *Arch. Gen. Psychiatry* **64**, 1189 (2007). URL [https://doi.org/10.1001/archpsyc.64.10.](https://doi.org/10.1001/archpsyc.64.10.1189)  
587 [1189](https://doi.org/10.1001/archpsyc.64.10.1189). DOI 10.1001/archpsyc.64.10.1189.
- 588 **97.** Prado-Martinez, J. *et al.* Great ape genetic diversity and population history. *Nat.* **499**, 471 (2013).
- 589 **98.** Staes, N. *et al.* Chimpanzee sociability is associated with vasopressin (avpr1a) but not oxytocin receptor gene (oxtr)  
590 variation. *Horm. behavior* **75**, 84–90 (2015).
- 591 **99.** Staes, N. *et al.* Bonobo personality traits are heritable and associated with vasopressin receptor gene 1a variation. *Sci.*  
592 *reports* **6**, 38193 (2016).
- 593 **100.** Curley, J. P. & Keverne, E. B. Genes, brains and mammalian social bonds. *Trends Ecol. & Evol.* **20**, 561–567 (2005).  
594 URL <https://doi.org/10.1016/j.tree.2005.05.018>. DOI 10.1016/j.tree.2005.05.018.
- 595 **101.** O'Rourke, T. & Boeckx, C. Converging roles of glutamate receptors in domestication and prosociality. *bioRxiv* (2018).  
596 URL <https://www.biorxiv.org/content/early/2018/10/11/439869>. DOI 10.1101/439869.
- 597 **102.** Schaefer, K., Fink, B., Mitteroecker, P., Neave, N. & Bookstein, F. L. Visualizing facial shape regression upon 2nd to 4th  
598 digit ratio and testosterone. *Coll. antropologicum* **29**, 415–419 (2005).
- 599 **103.** Nelson, E., Rolian, C., Cashmore, L. & Shultz, S. Digit ratios predict polygyny in early apes, ardpithecus, neanderthals  
600 and early modern humans but not in australopithecus. *Proc. Royal Soc. Lond. B: Biol. Sci.* **278**, 1556–1563 (2011).
- 601 **104.** Weisman, O. *et al.* The association between 2d: 4d ratio and cognitive empathy is contingent on a common polymorphism  
602 in the oxytocin receptor gene (oxtr rs53576). *Psychoneuroendocrinology* **58**, 23–32 (2015).
- 603 **105.** Fam, B. S. *et al.* Oxytocin and arginine vasopressin systems in the domestication process. *Genet.*  
604 **41**, 235 – 242 (2018). URL [http://www.scielo.br/scielo.php?script=sci\\_arttext&pid=](http://www.scielo.br/scielo.php?script=sci_arttext&pid=S1415-47572018000200235&nrm=iso)  
605 [S1415-47572018000200235&nrm=iso](http://www.scielo.br/scielo.php?script=sci_arttext&pid=S1415-47572018000200235&nrm=iso).
- 606 **106.** Herbeck, Y. E. & Gulevich, R. G. Neuropeptides as facilitators of domestication. *Cell Tissue Res.* 1–13 (2018).
- 607 **107.** Tan, J., Ariely, D. & Hare, B. Bonobos respond prosocially toward members of other groups. *Sci. Reports* **7** (2017). URL  
608 <https://doi.org/10.1038/s41598-017-15320-w>. DOI 10.1038/s41598-017-15320-w.
- 609 **108.** Hare, B. & Wrangham, R. W. Equal, similar, but different: Convergent bonobos and conserved chimpanzees. In Muller,  
610 M. M., Wrangham, R. & Pilbeam, D. R. (eds.) *Chimpanzees and Human Evolution*, chap. 3, 142–173 (Harvard University  
611 Press, Harvard, 2017).
- 612 **109.** Chamary, J., Parmley, J. L. & Hurst, L. D. Hearing silence: non-neutral evolution at synonymous sites in mammals. *Nat.*  
613 *Rev. Genet.* **7**, 98 (2006).
- 614 **110.** Rogers, A. R., Bohlender, R. J. & Huff, C. D. Early history of neanderthals and denisovans. *Proc. Natl. Acad. Sci.* **114**,  
615 9859–9863 (2017). URL <https://doi.org/10.1073/pnas.1706426114>. DOI 10.1073/pnas.1706426114.
- 616 **111.** Belsky, J. Variation in susceptibility to environmental influence: An evolutionary argument. *Psychol. inquiry* **8**, 182–186  
617 (1997).
- 618 **112.** Hublin, J.-J., Neubauer, S. & Gunz, P. Brain ontogeny and life history in pleistocene hominins. *Phil. Trans. R. Soc. B* **370**,  
619 20140062 (2015).
- 620 **113.** Auton, A. *et al.* A global reference for human genetic variation. *Nat.* **526**, 68–74 (2015). URL [https://doi.org/](https://doi.org/10.1038/nature15393)  
621 [10.1038/nature15393](https://doi.org/10.1038/nature15393). DOI 10.1038/nature15393.
- 622 **114.** Yates, A. *et al.* Ensembl 2016. *Nucleic Acids Res.* **44**, D710–D716 (2015). URL [https://doi.org/10.1093/](https://doi.org/10.1093/nar/gkv1157)  
623 [nar/gkv1157](https://doi.org/10.1093/nar/gkv1157). DOI 10.1093/nar/gkv1157.
- 624 **115.** Larsson, A. AliView: a fast and lightweight alignment viewer and editor for large datasets. *Bioinforma.* **30**, 3276–3278  
625 (2014). URL <https://doi.org/10.1093/bioinformatics/btu531>. DOI 10.1093/bioinformatics/btu531.
- 626 **116.** Wright, E. Decipher (2017). DOI 10.18129/b9.bioc.decipher.

- 627 **117.** Edgar, R. C. Muscle: multiple sequence alignment with high accuracy and high throughput. *Nucleic acids research* **32**,  
628 1792–1797 (2004).
- 629 **118.** Brown, N. P., Leroy, C. & Sander, C. Mview: a web-compatible database search or multiple alignment viewer. *Bioinforma.*  
630 (*Oxford, England*) **14**, 380–381 (1998).
- 631 **119.** Robinson, J. T. *et al.* Integrative genomics viewer. *Nat. biotechnology* **29**, 24 (2011).
- 632 **120.** NCBI Resource Coordinators. Database resources of the ncbi. *Nucleic Acids Res.* **45**, D12–D17 (2016). URL  
633 <https://doi.org/10.1093/nar/gkw1071>. DOI 10.1093/nar/gkw1071.
- 634 **121.** Lee, C. & Huang, C.-H. LASAGNA-search: an integrated web tool for transcription factor binding site search and visual-  
635 ization. *BioTechniques* **54** (2013). URL <https://doi.org/10.2144/000113999>. DOI 10.2144/000113999.
- 636 **122.** Hecht, M., Bromberg, Y. & Rost, B. Better prediction of functional effects for sequence variants. *BMC Genomics* **16**, S1  
637 (2015). URL <https://doi.org/10.1186/1471-2164-16-s8-s1>. DOI 10.1186/1471-2164-16-s8-s1.
